# Supplementary material
Source: PubMed Central journal article supplement (PMC3883109)
Supplement: NIHMS537740-supplement-Supplementary_Figure.pdf [file NIHMS537740-supplement-Supplementary_Figure.pdf]

## a) IFN- $\gamma$ ELISPOT with PBMC

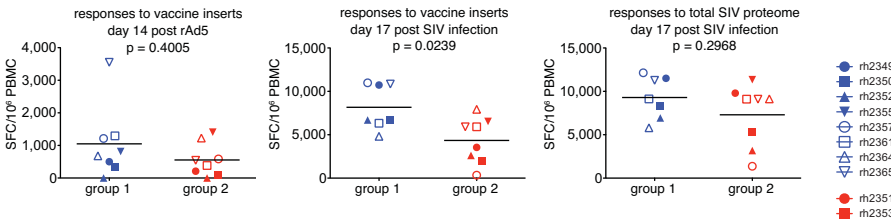

## b) IFN- $\gamma$ ELISPOT with CD8-depleted PBMC

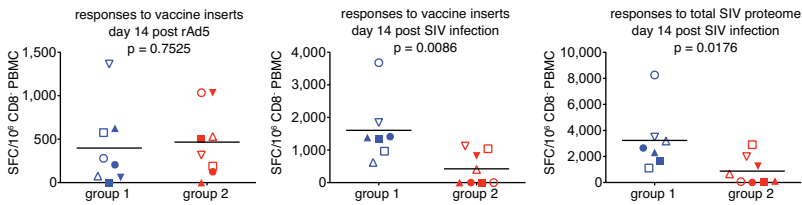

**Supplementary Figure 1.** Magnitude of cellular immune responses to vaccine inserts and the entire SIV proteome. We performed IFN- $\gamma$  ELISPOT in total PBMC (A) and CD8-depleted PBMC (B) at 14 days after the rAd5 boost, as well as days 14 and 17 after SIV infection. The frequency of vaccine-induced T-cell responses to the SIV inserts measured at day 14 after the rAd5 boost was not significantly different between Group 1 and Group 2 macaques. However, Group 1 animals had higher insert-specific responses early after infection in both PBMC and CD8-depleted PBMC. This difference remained statistically significant when we compared the magnitude of T-cell responses to the entire SIV proteome in CD8-depleted PBMC, but not in whole PBMC. These results show that our vaccine regimens were equally efficacious at engendering both CD4<sup>+</sup> and CD8<sup>+</sup> T cell responses in Group 1 and Group 2 animals. The lower frequency of anamnestic CD4<sup>+</sup> T-cell responses detected in group 2 macaques may be a consequence of the high levels of viral replication measured in this group. Bars represent mean values for each group. Statistical comparisons were made using two-tailed Mann-Whitney tests. Due to sample limitations, rh2355 was not included in the post-infection analyses.

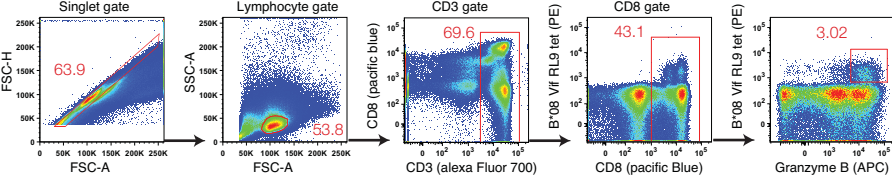

**Supplemental figure 2.** Gating strategy used for the analysis of granzyme B expression among tetramer<sup>+</sup> CD8<sup>+</sup> T-cells. Numbers in each panel represent the percentage of the gated cell population.
